# Supplementary material for: l-Proline Alleviates Kidney Injury Caused by AFB1 and AFM1 through Regulating Excessive Apoptosis of Kidney Cells
Source: Toxins (Basel). 2019 Apr 16;11(4):226. doi: 10.3390/toxins11040226 (PMC6521284; doi:10.3390/toxins11040226)
Supplement: Supplementary file 1 [file toxins-11-00226-s001.pdf]

# Supplementary Materials: L-Proline Alleviates Kidney Injury Caused by AFB1 and AFM1 through Regulating Excessive Apoptosis of Kidney Cells

Huiying Li †, Songli Li †, Huaigu Yang, Yizhen Wang, Jiaqi Wang and Nan Zheng \*

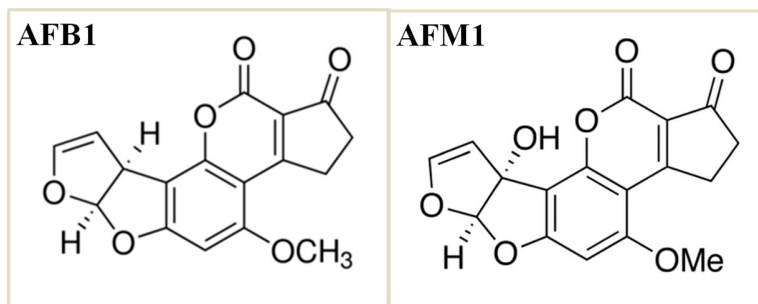

**Figure S1.** Chemical structure of aflatoxin B1 (AFB1) (A) and aflatoxin M1 (AFM1) (B).

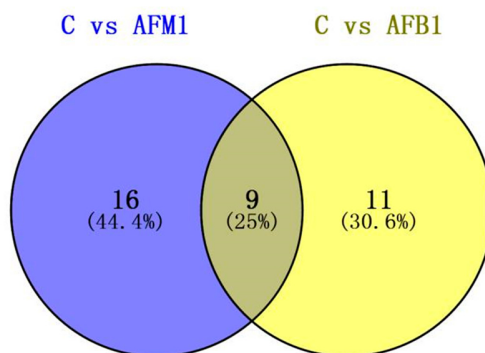

**Figure S2.** Special metabolites overlapped in different groups (control, AFB1 group and AFM1 group) in mice kidneys (VENN plot), through metabonomics detection and data analysis.
